# Supplementary material for: A Rare Case of Hepatic Vanishing Bile Duct Syndrome Occurring after Combination Therapy with Nivolumab and Cabozantinib in a Patient with Renal Carcinoma
Source: MDPI journal article supplement (doi:10.3390/diagnostics12020539), 2022-02-19
Supplement: s1 [file s1]

## Supplementary Data.

### *Data S1. Tissue immunophenotyping.*

Four-micrometer sections from full FFPE blocks were used for manual multiplex immunohistochemistry (mIHC) staining according to the manufacturer's instructions (Opal 7 Solid Tumor Immunology kit, Akoya Biosciences®).

The used antibodies were CD4 (80 ng/ml, 90 min, Akoya Biosciences®), CD8 (68 ng/ml, 90 min, Akoya Biosciences®), CD20 (45 ng/ml, 90 min, Akoya Biosciences®), FOXP3 (674 ng/ml, 90 min, Akoya Biosciences®), CD68 (16 ng/ml, 90 min, Akoya Biosciences®), and panCK (400 ng/ml, 90 min, Akoya Biosciences®).

Slides were mounted with Vectashield Hardset Antifade Mounting Medium (Vector Laboratories). Multiplexed slides were scanned on Vectra Polaris Automated Quantitative Pathology Imaging System (Akoya Biosciences®). InForm® Tissue Finder™ software was used in order to deconvolute the multispectral images, to segment tissue, and to segment and phenotype cells. The percentage of cells was calculated on full section except for lung metastasis for which 25 % of the section was multispectrally acquired. Digital quantification was then performed using PhenoptrReports (Akoya Biosciences®). GraphPad Prism8 software was used to graph individual datapoint.

### *Data S2. Peripheral blood immunophenotyping.*

Fifty-microliter of whole blood pre-treated with Human Fc Receptor Binding Inhibitor (eBiosciences) was incubated with manufacturer's suggested dilutions of fluorescently labelled primary monoclonal antibodies (*Supplementary Table 1*) for 30 min at 4°C followed by red blood cell lysis buffer (Miltenyi Biotec) during 10 min at room temperature.

Peripheral blood mononuclear cells (PBMC) were purified by density gradient centrifugation over Lymphoprep™ (Stemcell technologies) and washed three times before flow cytometry staining. PBMC were incubated with manufacturer's suggested dilutions of fluorescently labelled primary monoclonal antibodies (*Supplementary Table 1*) for 30 min at 4°C followed by washing with of PBS. Whole blood and PBMC were then immediately acquired on a GALLIOS 10/3 cytometer (Beckman Coulter), and analysed on Kaluza Flow Cytometry Analysis v1.2 software (Beckman Coulter).

### *Data S3. Supplementary Table S1. Antibodies used for flow cytometry.*

| Name   | Conjugaison     | Firme            | Applications      |
|--------|-----------------|------------------|-------------------|
| CCR7   | APC/Cy7         | BioLegend        | PBMC              |
| CD103  | PE              | Miltenyi         | PBMC              |
| CD127  | APC             | eBiosciences     | PBMC              |
| CD138  | APC             | Miltenyi         | PBMC              |
| CD14   | APC-Vio770      | Miltenyi         | Whole Blood       |
| CD15   | eFluor450       | eBiosciences     | Whole Blood       |
| CD16   | PC7             | eBiosciences     | Whole Blood       |
| CD19   | APC-Vio770      | Miltenyi         | Whole Blood, PBMC |
| CD1d   | PercPeF710      | eBiosciences     | PBMC              |
| CD20   | Alexa Fluor700  | eBiosciences     | PBMC              |
| CD21   | FITC            | Miltenyi         | PBMC              |
| CD24   | FITC            | Miltenyi         | Whole Blood       |
| CD25   | PercPeF710      | eBiosciences     | PBMC              |
| CD27   | PC7             | Miltenyi         | PBMC              |
| CD3    | eFluor450       | eBiosciences     | Whole Blood, PBMC |
| CD38   | APC             | Miltenyi         | PBMC              |
| CD38   | PerCP eFluor710 |                  | PBMC              |
| CD39   | ViobrightFITC   | Miltenyi         | PBMC              |
| CD4    | AlexaFluor70    | eBiosciences     | Whole Blood, PBMC |
| CD44   | VioBlue         | Miltenyi         | PBMC              |
| CD45   | Pacific Orange  | eBiosciences     | Whole Blood, PBMC |
| CD45RA | PE-Vio770       | Miltenyi         | PBMC              |
| CD45RO | FITC            | Becton Dickinson | PBMC              |
| CD49d  | APC             | Miltenyi         | Whole Blood       |

|       |                |              |                   |
|-------|----------------|--------------|-------------------|
| CD56  | PE             |              | Whole Blood       |
| CD56  | FITC           | Miltenyi     | PBMC              |
| CD62L | PE-Vio770      |              | PBMC              |
| CD64  | PercPeF710     | eBiosciences | Whole Blood       |
| CD69  | PE             | eBiosciences | Whole Blood, PBMC |
| CD8   | PE-eFluor610   | eBiosciences | Whole Blood, PBMC |
| ICOS  | PC7            | eBiosciences | PBMC              |
| IgD   | PE             | Miltenyi     | PBMC              |
| IgG   | VioBlue        | Miltenyi     | PBMC              |
| PD-1  | Viobright-FITC | Miltenyi     | PBMC              |
